# Supplementary material for: Factor structure of the Social Phobia Scale (SPS) and the Social Interaction Anxiety Scale (SIAS) in a clinical sample recruited from the community
Source: Springer Nature journal article supplement (doi:10.1186/s12888-023-05142-8), 2023-09-04
Supplement: MOESM2 [file 26002920]

**Supplementary Table 1**

*Comparison of item responses between sample (a) & sample (b)*

| SPS Item Nr.  | Sample (a) |      | Sample (b) |      | U     | p(U) |
|---------------|------------|------|------------|------|-------|------|
|               | Mean       | SD   | Mean       | SD   |       |      |
| <b>1</b>      | 1.47       | 1.11 | 1.4        | 1.18 | 11633 | .453 |
| <b>2</b>      | 0.9        | 1.11 | 1.01       | 1.11 | 10325 | .266 |
| <b>3</b>      | 2.01       | 1.36 | 2.03       | 1.13 | 11004 | .894 |
| <b>4</b>      | 1.78       | 1.31 | 1.73       | 1.29 | 11308 | .774 |
| <b>5</b>      | 1.81       | 1.54 | 1.79       | 1.44 | 11172 | .921 |
| <b>6</b>      | 2.84       | 1.1  | 2.7        | 1.07 | 11949 | .235 |
| <b>7</b>      | 1.93       | 1.45 | 1.8        | 1.56 | 11771 | .355 |
| <b>8</b>      | 1.77       | 1.37 | 1.74       | 1.33 | 11192 | .900 |
| <b>9</b>      | 1.01       | 1.35 | 1.24       | 1.48 | 10194 | .189 |
| <b>10</b>     | 0.97       | 1.15 | 0.97       | 1.22 | 11188 | .900 |
| <b>11</b>     | 1.68       | 1.34 | 1.68       | 1.41 | 11134 | .964 |
| <b>12</b>     | 2.97       | 1.07 | 3.07       | 1.02 | 10543 | .427 |
| <b>13</b>     | 2.08       | 1.29 | 2.17       | 1.36 | 10675 | .558 |
| <b>14</b>     | 2          | 1.31 | 2.13       | 1.36 | 10487 | .398 |
| <b>15</b>     | 2.75       | 1.08 | 2.66       | 1.18 | 11462 | .614 |
| <b>16</b>     | 2.21       | 1.31 | 2.08       | 1.27 | 11781 | .348 |
| <b>17</b>     | 1.58       | 1.33 | 1.58       | 1.39 | 11219 | .870 |
| <b>18</b>     | 3.45       | 0.9  | 3.43       | 0.83 | 11511 | .523 |
| <b>19</b>     | 0.59       | 1.14 | 0.74       | 1.25 | 10392 | .245 |
| <b>20</b>     | 3.2        | 0.99 | 3.24       | 1.09 | 10500 | .373 |
| SIAS Item Nr. | Sample (a) |      | Sample (b) |      | U     | p(w) |
|               | Mean       | SD   | Mean       | SD   |       |      |
| <b>1</b>      | 2.91       | 1.12 | 3.05       | 1.03 | 10381 | .307 |
| <b>2</b>      | 2.07       | 1.33 | 2.15       | 1.28 | 10698 | .579 |
| <b>3</b>      | 2.45       | 1.26 | 2.64       | 1.28 | 10072 | .154 |
| <b>4</b>      | 1.68       | 1.26 | 1.6        | 1.11 | 11341 | .738 |
| <b>5</b>      | 3.15       | 1.03 | 3.14       | 1.06 | 11054 | .946 |
| <b>6</b>      | 2.26       | 1.25 | 2.26       | 1.35 | 11104 | .997 |
| <b>7</b>      | 2.01       | 1.11 | 1.97       | 1.02 | 11177 | .914 |
| <b>8</b>      | 1.83       | 1.29 | 1.82       | 1.29 | 11140 | .956 |
| <b>9</b>      | 3.27       | 0.89 | 3.12       | 1.03 | 11776 | .326 |
| <b>10</b>     | 2.35       | 1.22 | 2.21       | 1.23 | 11825 | .317 |
| <b>11</b>     | 3.17       | 1.05 | 3.24       | 0.96 | 10805 | .665 |
| <b>12</b>     | 2.76       | 1.14 | 2.85       | 1.08 | 10638 | .517 |
| <b>13</b>     | 2.13       | 1.29 | 2.11       | 1.35 | 11171 | .923 |
| <b>14</b>     | 2.64       | 1.3  | 2.58       | 1.32 | 11380 | .698 |
| <b>15</b>     | 2.89       | 1.26 | 3.03       | 1.17 | 10510 | .399 |

|           |      |      |      |      |       |      |
|-----------|------|------|------|------|-------|------|
| <b>16</b> | 2.84 | 1.09 | 2.91 | 0.98 | 10888 | .765 |
| <b>17</b> | 2.41 | 1.33 | 2.46 | 1.28 | 10893 | .775 |
| <b>18</b> | 2.42 | 1.33 | 2.4  | 1.34 | 11187 | .906 |
| <b>19</b> | 3.25 | 0.9  | 3.26 | 0.89 | 11011 | .896 |
| <b>20</b> | 2.32 | 1.48 | 2.13 | 1.45 | 11954 | .240 |

*Note. Sample (a) = sample from Schulz et al. (16); Sample (b) = sample from Stolz et al. (17)*
